# Supplementary material for: First-principles investigation of the hydrogen evolution reaction of transition metal phosphides CrP, MnP, FeP, CoP, and NiP
Source: Royal Society of Chemistry journal article supplement (doi:10.1039/d0cp04789a), 2020-12-18
Supplement: d0cp04789a1.pdf [file d0cp04789a1.pdf]

## Supporting information

# First-principles investigation of the hydrogen evolution reaction of transition metal phosphides CrP, MnP, FeP, CoP, and NiP

Ta-Wei Wang, Tan-Ling Wang, Wan-Jou Chou, Li-Fan Wu, and Shi-Hsin Lin\*

*Department of Materials and Optoelectronic Science, Center of Crystal Research, National  
Sun Yat-sen University, Kaohsiung 804, Taiwan*

E-mail: [albert@mail.nsysu.edu.tw](mailto:albert@mail.nsysu.edu.tw)

## Computational details

We performed first-principles calculation to investigate the hydrogen evolution reaction of CrP, MnP, FeP, CoP, and NiP. The structures were fully relaxed, and the obtained lattice constants were listed in the following table 1.

Table 1: Lattice constants of considered MP.

|     | a (Å) | b (Å) | c (Å) |
|-----|-------|-------|-------|
| CrP | 5.908 | 5.288 | 3.029 |
| MnP | 5.820 | 5.156 | 3.098 |
| FeP | 5.109 | 5.712 | 3.003 |
| CoP | 5.519 | 5.022 | 3.219 |
| NiP | 5.808 | 4.868 | 3.408 |

For the surface calculations, we used 6 layers of atoms for the surface models (see Fig. 1, and we fixed the bottom 4 layers. We considered various adsorption sites for the hydrogen adsorption on the surface. Those adsorption sites were shown in the following Fig. 1, including the sites on top of the metal atoms with different coordination (denoted as  $T_{M1}$  and  $T_{M2}$ ), and the bridge sites between two atoms, for example, between the two metal atoms  $M_1$  and  $M_2$  (denoted as  $B_{M1-M1'}$ ) or between the metal atom and phosphorus atom (denoted as  $B_{M1-P1}$  or  $B_{M1-P2}$ )

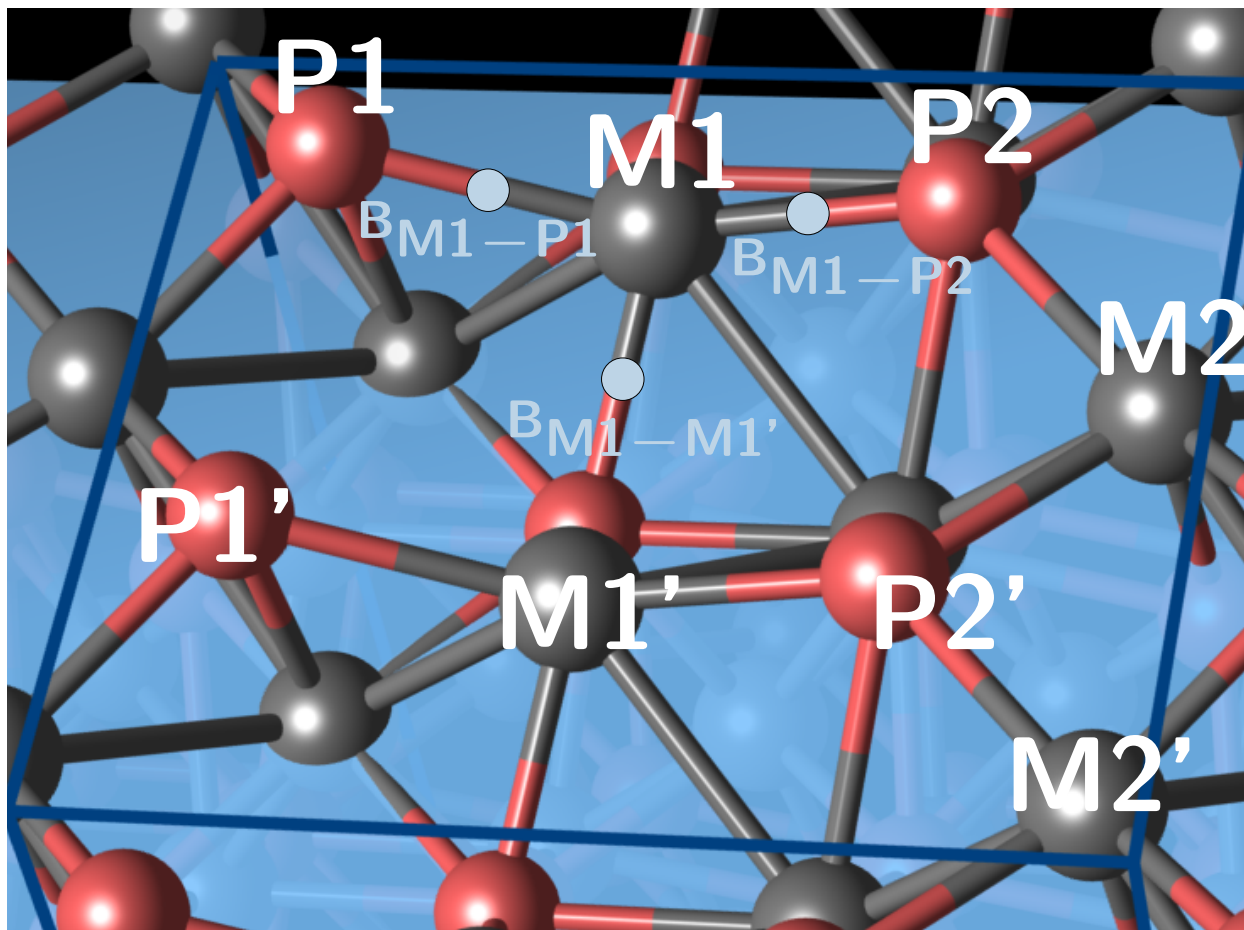

Figure 1: The adsorption sites on the surface. The dark blue line is the cell boundary.
